# Supplementary material
Source: Hindawi journal article supplement (doi:10.1155/2011/342462)

### Supplemental figure:

The time-domain waveform of the instrumentation without touching the hands is viewed as background noise and shown in the following figure (a). Its power spectral density is shown in the following figure (b). The average power spectral density (0~10 Hz) is equal to  $1.5 \times 10^{-15} \text{ V}^2/\text{Hz}$ .

(a)

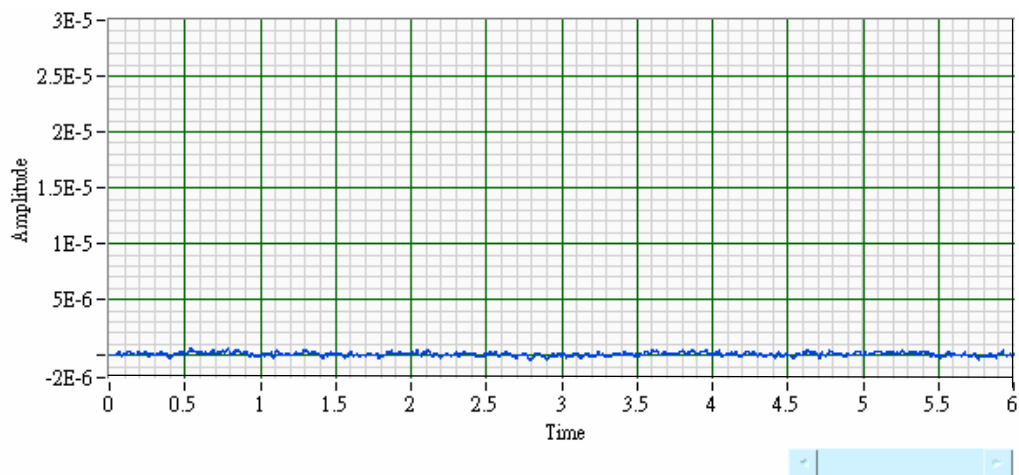

(b)

PSD

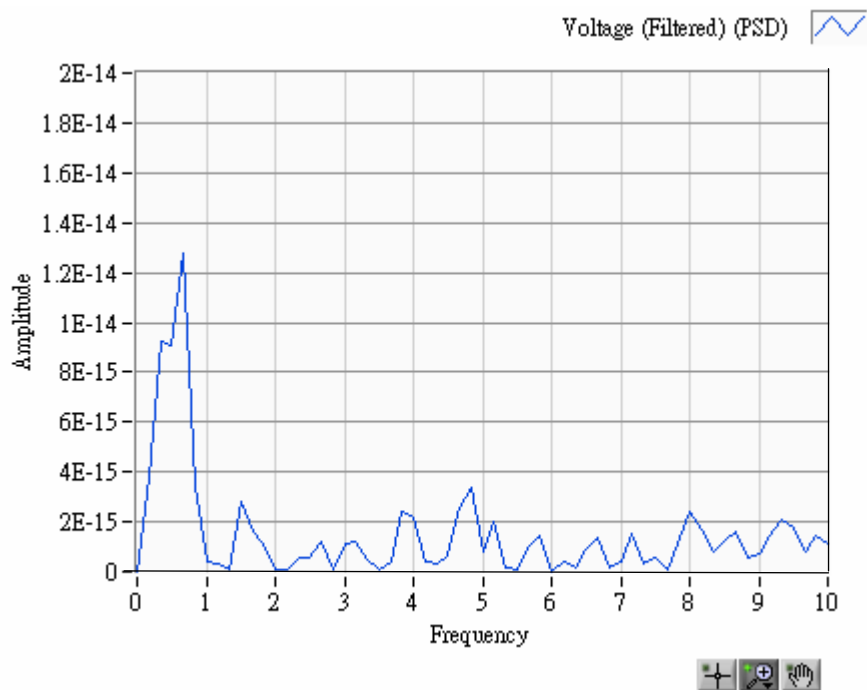

Supplement: f1 [file 342462.f1.pdf]
